# Supplementary material for: Identification and characterization of novel sesquiterpene synthases TPS9 and TPS12 from Aquilaria sinensis
Source: PeerJ. 2023 Aug 30;11:e15818. doi: 10.7717/peerj.15818 (PMC10474832; doi:10.7717/peerj.15818)
Supplement: Supplemental Information 4 [file peerj-11-15818-s004.xlsx]

## Sheet: RI
TPS9
FPP	Rt(tx)	n	tn	tn+1	RI	Mean RI
shyobunol	12.642	14	12.55	14.5	1404.72
1	12.642	14	12.553	14.497	1404.58	1404.52
2	12.642	14	12.559	14.508	1404.26
β-farnesene	12.711	14	12.55	14.5	1408.26	1408.06
1	12.711	14	12.553	14.497	1408.13
2	12.711	14	12.559	14.508	1407.8
cis-sesquisabinene hydrate	15.837	15	14.5	17.352	1546.88	1546.81
1	15.837	15	14.497	17.347	1547.02
2	15.837	15	14.508	17.364	1546.53
cedrol	16.066	15	14.5	17.352	1554.91	1554.84
1	16.066	15	14.497	17.347	1555.05
2	16.066	15	14.508	17.364	1554.55
TPS12
FPP	Rt(tx)	n	tn	tn+1	RI	Mean RI
β-farnesene	12.713	14	12.55	14.5	1408.36	1408.16
1	12.713	14	12.553	14.497	1408.23
2	12.713	14	12.559	14.508	1407.9
nerolidol	14.842	15	14.5	17.352	1511.99	1511.93
1	14.842	15	14.497	17.347	1512.11
2	14.842	15	14.508	17.364	1511.69
γ-eudesmol	16.875	15	14.5	17.352	1583.27	1583.2
1	16.875	15	14.497	17.347	1583.44
2	16.875	15	14.508	17.364	1582.88
hinesol	17.493	16	17.352	21.735	1603.22	1603.2
1	17.493	16	17.347	21.602	1603.43
2	17.493	16	17.364	21.751	1602.94
TPS9
GPP	Rt(tx)	n	tn	tn+1	RI	Mean RI
β-myrcene	5.712	9	4.978	6.522	947.539	947.173
1	5.712	9	4.989	6.519	947.255
2	5.712	9	5.006	6.517	946.724
limonene	6.323	9	4.978	6.522	987.111	987.154
1	6.323	9	4.989	6.519	987.19
2	6.323	9	5.006	6.517	987.161
3-carene	6.436	9	4.978	6.522	994.43	994.548
1	6.436	9	4.989	6.519	994.575
2	6.436	9	5.006	6.517	994.639
α-pinene	6.605	10	6.522	8.107	1005.24	1005.4
1	6.605	10	6.519	8.107	1005.42
2	6.605	10	6.517	8.104	1005.55
citronellol	9.328	11	8.107	9.637	1179.8	1179.77
1	9.328	11	8.107	9.637	1179.8
2	9.328	11	8.104	9.64	1179.69
geraniol	9.739	12	9.637	11.081	1207.06	1205.84
1	9.739	12	9.637	11.084	1207.05
2	9.739	12	9.64	12.553	1203.4
citral	9.927	12	9.637	11.081	1220.08	1216.66
1	9.927	12	9.637	11.084	1220.04
2	9.927	12	9.64	12.553	1209.85
TPS12
GPP	Rt(tx)	n	tn	tn+1	RI	Mean RI
β-myrcene	5.724	9	4.978	6.522	948.316	947.958
1	5.724	9	4.989	6.519	948.039
2	5.724	9	5.006	6.517	947.518
α-pinene	6.616	10	6.522	8.107	1005.93	1006.09
1	6.616	10	6.519	8.107	1006.11
2	6.616	10	6.517	8.104	1006.24
3-carene	7.936	10	6.522	8.107	1089.21	1089.29
1	7.936	10	6.519	8.107	1089.23
2	7.936	10	6.517	8.104	1089.41
citral	9.769	12	9.637	11.081	1209.14	1207.56
1	9.769	12	9.637	11.084	1209.12
2	9.769	12	9.64	12.553	1204.43
