# Supplementary material for: Identification and characterization of novel sesquiterpene synthases TPS9 and TPS12 from Aquilaria sinensis
Source: PeerJ. 2023 Aug 30;11:e15818. doi: 10.7717/peerj.15818 (PMC10474832; doi:10.7717/peerj.15818)
Supplement: Supplemental Information 6 [file peerj-11-15818-s006.xlsx]

## Sheet: Sheet1
Figure 7A
TPS9-heat	0h-1	6h-1	12h-1	24h-1	36h-1	48h-1	72h-1
	1	3.24901	1.79627	1.64338	55.2665	48.559	66.8721
	0h-2	6h-2	12h-2	24h-2	36h-2	48h-2	72h-2
	1	1.83825	1.25701	0.835088	96.6702	72.7563	86.2229
	0h-3	6h-3	12h-3	24h-3	36h-3	48h-3	72h-3
	1	2.39496	1.29235	1.41095	71.7546	42.2731	85.9246
TPS9-MeJA	0h-1	6h-1	12h-1	24h-1	36h-1	48h-1	4d-1	7d-1
	1	30.4563	41.5468	29.5824	27.9543	11.5514	14.8254	35.6342
	0h-2	6h-2	12h-2	24h-2	36h-2	48h-2	4d-2	7d-2
	1	36.8008	37.923	28.5417	21.5557	10.7928	24.2795	55.139
	0h-3	6h-3	12h-3	24h-3	36h-3	48h-3	4d-3	7d-3
	1	34.4158	34.0598	26.8466	20.3459	11.8187	17.4683	40.7859
TPS9-SA	0h-1	2h-1	8h-1	24h-1	72h-1	9d-1	13d-1
	1	1.06191	0.899171	3.47417	0.50406	1.51572	3.89062
	0h-2	2h-2	8h-2	24h-2	72h-2	9d-2	13d-2
	1	0.30566	0.348686	2.6087	0.241484	0.498846	2.75108
	0h-3	2h-1	8h-3	24h-3	72h-3	9d-3	13d-3
	1	1.05458	0.808508	4.36707	0.607097	1.76949	3.44221
TPS9-ABA	0h-1	6h-1	12h-1	1d-1	5d-1	10d-1
	1	1.8891	2.13166	1.85331	10.3623	0.31688
	0h-2	6h-2	12h-2	1d-2	5d-2	10d-2
	1	2.80092	1.41729	2.5137	15.8781	0.458501
	0h-3	6h-3	12h-3	1d-3	5d-3	10d-3
	1	2.82719	2.43804	1.62028	19.2357	0.804368
TPS9-Man	0h-1	6h-1	12h-1	1d-1	5d-1	10d-1
	1	15.8347	14.3048	18.9074	3.76329	1.70167
	0h-2	6h-2	12h-2	1d-2	5d-2	10d-2
	1	6.596	14.8759	17.9644	4.53931	1.93221
	0h-3	6h-3	12h-3	1d-3	5d-3	10d-3
	1	11.9198	15.4417	28.3088	5.06177	1.83332
TPS9-H2O2	0h-1	6h-1	12h-1	1d-1	5d-1
	1	2.39437	1.46404	0.702312	3.09326
	0h-2	6h-2	12h-2	1d-2	5d-2
	1	1.486	1.08343	0.984382	2.93708
	0h-3	6h-3	12h-3	1d-3	5d-3
	1	1.57686	1.96535	0.835169	2.36593
TPS9-NACL	0h-1	6h-1	12h-1	1d-1	5d-1
	1	3.53291	17.1594	52.1187	8.13059
	0h-2	6h-2	12h-2	1d-2	5d-2
	1	0.924981	7.46675	62.264	11.3697
	0h-3	6h-3	12h-3	1d-3	5d-3
	1	8.88417	18.197	52.3989	12.348
Figure 7B
TPS12-heat	0h-1	6h-1	12h-1	24h-1	36h-1	48h-1	72h-1
	1	1.56917	5.95871	2.4909	18.7004	23.8348	7.48153
	0h-2	6h-2	12h-2	24h-2	36h-2	48h-2	72h-2
	1	1.04488	4.07933	1.69937	16.4308	22.6798	9.06307
	0h-3	6h-3	12h-3	24h-3	36h-3	48h-3	72h-3
	1	1.47768	3.97237	1.87038	24.1028	22.9168	10.3627
TPS12-MeJA	0h-1	6h-1	12h-1	24h-1	36h-1	48h-1	4d-1	7d-1
	1	2.04344	5.66994	48.8967	188.489	94.0268	595.655	1220.57
	0h-2	6h-2	12h-2	24h-2	36h-2	48h-2	4d-2	7d-2
	1	0.830278	2.97935	59.3016	403.568	69.3104	643.591	1499.22
	0h-3	6h-3	12h-3	24h-3	36h-3	48h-3	4d-3	7d-3
	1	1.5245	2.10672	36.886	179.769	75.8459	338.185	955.426
TPS12-SA	0h-1	2h-1	8h-1	24h-1	72h-1	9d-1	13d-1
	1	1.29235	1.90308	4.60542	2.35653	40.8803	60.9688
	0h-2	2h-2	8h-2	24h-2	72h-2	9d-2	13d-2
	1	0.45376	1.28046	3.8282	1.70527	21.9579	75.322
	0h-3	2h-1	8h-3	24h-3	72h-3	9d-3	13d-3
	1	1.81085	2.03261	4.55252	3.38698	53.1992	72.1703
TPS12-ABA	0h-1	6h-1	12h-1	1d-1	5d-1	10d-1
	1	2.35649	0.675792	1.0237	8.5354	0.89907
	0h-2	6h-2	12h-2	1d-2	5d-2	10d-2
	1	2.24998	0.817264	1.58299	10.2933	0.82889
	0h-3	6h-3	12h-3	1d-3	5d-3	10d-3
	1	2.35934	1.03106	2.413	15.1326	0.621138
TPS12-Man	0h-1	6h-1	12h-1	1d-1	5d-1	10d-1
	1	1.19362	2.30276	4.26329	20.6417	0.642713
	0h-2	6h-2	12h-2	1d-2	5d-2	10d-2
	1	1.0275	1.35313	3.1574	22.4077	0.437785
	0h-3	6h-3	12h-3	1d-3	5d-3	10d-3
	1	2.59199	2.10441	4.78904	14.5229	0.597311
TPS12-H2O2	0h-1	6h-1	12h-1	1d-1	5d-1
	1	0.289328	1.55916	0.320427	6.79068
	0h-2	6h-2	12h-2	1d-2	5d-2
	1	1.10119	3.69583	0.810456	5.84801
	0h-3	6h-3	12h-3	1d-3	5d-3
	1	1.45811	4.91963	0.966594	7.19611
TPS12-NACL	0h-1	6h-1	12h-1	1d-1	5d-1
	1	1.72389	11.317	265.316	224.004
	0h-2	6h-2	12h-2	1d-2	5d-2
	1	1.9061	11.5148	248.582	223.773
	0h-3	6h-3	12h-3	1d-3	5d-3
	1	2.31211	14.041	416.442	242.626
